# Supplementary material for: Exploring the performance reserve: Effect of different magnitudes of power output deception on 4,000 m cycling time-trial performance
Source: PLoS One. 2017 Mar 9;12(3):e0173120. doi: 10.1371/journal.pone.0173120 (PMC5344378; doi:10.1371/journal.pone.0173120)
Supplement: S1 Dataset — (XLSX) [file pone.0173120.s001.xlsx]

## Sheet: Participant Information
	stature	mass	VO2peak
DEC_01	1.87	90	4.73
DEC_02	1.91	78.6	5.32
DEC_03	1.72	79.25	5.21
DEC_04	1.76	82.8	4.96
DEC_05	1.76	93.7	4.8
DEC_06	1.81	80.75	4.5
DEC_07	1.73	67.3	4.56
DEC_08	1.8	81.1	4.55
DEC_09	1.89	81.3	5.14
DEC_10	1.78	69	5.03

## Sheet: Affect
	BL	102	105
DEC_01	-2	-3	-4
DEC_02	-2	-4	-3
DEC_03	-3	-3	-3
DEC_04	-3	-3	-3
DEC_05	-1	1	0
DEC_06	2	0	-1
DEC_07	-4	-3	-3
DEC_08	-3	-3	-3
DEC_09	2	2	2
DEC_10	3	2	3

## Sheet: RPE
	BL	102	105
DEC_01	19	20	20
DEC_02	17	17	17
DEC_03	19	19	19
DEC_04	18	20	19
DEC_05	18	17	19
DEC_06	19	19	19
DEC_07	18	18	20
DEC_08	19	17	17
DEC_09	17	17	17
DEC_10	17	19	18

## Sheet: BLa
	BL	102	105
DEC_01	12.36	15.28	13.67
DEC_02	11.41	15.57	15.36
DEC_03	9.23	9.61	8.43
DEC_04	17.7	18.59	19.81
DEC_05	9.13	10.85	9.58
DEC_06	13.81	14.08	12.75
DEC_07	8.85	9.71	9.26
DEC_08	15.92	16.69	16.32
DEC_09	12.76	11.49	14.02
DEC_10	13.59	14.37	10.31

## Sheet: Speed
	BL	102	105
DEC_01	39.37	39.9	40.09
DEC_02	39.76	40.38	40.42
DEC_03	40.95	41.5	41.26
DEC_04	39.88	40.35	39.6
DEC_05	39.51	40.18	39.63
DEC_06	40.48	40.8	40.53
DEC_07	39.38	40.1	40.32
DEC_08	39.22	39.37	38.91
DEC_09	40.49	40.87	40.85
DEC_10	40.1	39.91	40.48

## Sheet: Ptot
	BL_10	BL_20	BL_30	BL_40	BL_50	AVE	BL_60	BL_70	BL_80	BL_90	BL_100	AVE	102_10	102_20	102_30	102_40	102_50	AVE	102_60	102_70	102_80	102_90	102_100	AVE	105_10	105_20	105_30	105_40	105_50	AVE	105_60	105_70	105_80	105_90	105_100	AVE
DEC_01	456.762	363.579	297.598	285.379	281.264	336.916	287.589	289.848	300.523	291.826	332.087	300.375	372.041	360.332	335.066	312.105	300.811	336.071	288.88	288.177	294.781	366.34	353.772	318.39	368.992	363.924	337.02	313.06	300.844	336.768	302.791	306.136	309.255	329.404	372.965	324.11
DEC_02	304.94	367.369	333.722	309.568	302.215	323.563	309.617	303.442	307.736	333.161	370.119	324.815	310.921	351.042	343.622	340.787	326.758	334.626	322.454	330.831	325.817	366.285	352.882	339.654	334.77	361.265	339.55	331.246	321.706	337.708	318.837	322.913	325.882	345.33	371.313	336.855
DEC_03	436.17	454.498	389.096	315.416	305.521	380.14	299.839	330.237	315.986	358.088	421.754	345.181	451.575	428.698	392.849	352.312	331.383	391.364	332.009	315.156	306.797	393.346	398.175	349.096	449.822	452.805	410.877	368.495	355.889	407.578	313.665	333.004	305.542	317.34	361.603	326.231
DEC_04	337.787	313.557	312.839	344.427	344.184	330.559	329.258	327.939	317.425	319.656	312.61	321.378	362.111	338.143	322.445	349.771	343.328	343.159	316.94	354.013	351.796	336.135	311.716	334.12	371.301	300.02	293.957	302.715	378.765	329.352	350.399	331.246	297.019	296.108	318.507	318.656
DEC_05	442.592	386.559	292.653	294.722	290.457	341.397	311.475	323.97	288.201	270.573	327.61	304.366	419.964	382.86	299.487	303.095	314.697	344.021	306.991	300.078	351.77	333.032	350.549	328.484	321.793	337.535	306.477	297.679	333.97	319.491	340.099	320.639	312.272	305.022	333.013	322.209
DEC_06	378.493	357.322	349.133	336.386	325.514	349.369	337.951	323.175	312.602	310.705	358.819	328.65	408.314	372.931	341.341	322.212	307.763	350.512	313.983	325.398	347.439	373.355	352.521	342.539	446.119	399.836	309.959	308.656	320.962	357.106	311.497	305.49	307.839	355.983	353.365	326.835
DEC_07	371.435	321.102	302.281	315.352	310.189	324.072	307.898	300.429	295.884	296.82	340.793	308.365	392.49	360.461	337.322	329.786	319.176	347.847	312.895	310.648	312.181	314.102	357.501	321.465	353.531	347.37	335.207	339.207	336.183	342.299	337.767	333.172	330.624	334.023	350.924	337.302
DEC_08	341.511	369.673	304.217	286.3	291.039	318.548	306.434	298.059	310.407	315.286	329.3	311.897	355.76	326.768	306.634	296.336	292.906	315.681	296.704	290.029	303.441	307.843	377.008	315.005	347.042	303.064	307.222	298.336	290.481	309.229	303.631	304.07	319.913	300.719	279.832	301.633
DEC_09	293.012	347.959	346.02	338.644	340.31	333.189	334.152	333.647	343.855	380.371	348.271	348.059	329.441	330.708	354.137	374.065	353.439	348.358	343.239	338.351	329.705	347.764	374.187	346.649	349.745	384.323	389.568	354.583	341.794	364.003	332.764	323.282	310.052	326.717	363.008	331.165
DEC_10	373.341	332.476	328.987	320.857	319.234	334.979	310.466	308.535	312.589	319.578	380.718	326.377	354.292	353.154	326.49	297.117	299.804	326.171	301.893	305.633	309.95	323.817	403.676	328.994	360.699	357.009	345.257	334.011	321.425	343.68	320.329	320.771	320.623	332.744	375.433	333.98

## Sheet: Paer
	BL_10	BL_20	BL_30	BL_40	BL_50		BL_60	BL_70	BL_80	BL_90	BL_100		102_10	102_20	102_30	102_40	102_50		102_60	102_70	102_80	102_90	102_100		105_10	105_20	105_30	105_40	105_50		105_60	105_70	105_80	105_90	105_100
DEC_01	210.828	278.84	290.527	289.287	289.352	1358.83	289.36	291.638	297.924	300.137	304.236	1483.29	190.16	271.097	280.511	289.138	298.8	1329.71	301.562	300.791	302.507	311.476	319.916	1536.25	203.377	263.151	274.869	281.898	287.427	1310.72	291.769	293.488	301.371	303.017	307.964	1497.61
DEC_02	167.039	272.408	290.066	294.803	297.975	1322.29	304.147	309.671	309.781	306.713	309.471	1539.78	177.468	276.521	289.53	299.849	295.936	1339.3	305.087	298.716	297.103	303.045	303.32	1507.27	194.182	280.748	288.242	298.721	301.904	1363.8	304.578	300.885	298.085	304.397	305.973	1513.92
DEC_03	190.756	279.057	289.329	293.789	304.617	1357.55	312.185	307.081	310.071	308.136	322.811	1560.28	195.821	272.818	291.022	284.815	296.39	1340.87	286.527	289.923	303.843	297.996	290.729	1469.02	214.443	285.757	289.209	297.889	302.423	1389.72	298.859	302.272	301.178	299.297	295.75	1497.36
DEC_04	178.931	274.236	280.331	276.312	276.206	1286.02	275.776	278.909	281.198	280.182	279.134	1395.2	187.81	276.388	279.021	285.57	284.226	1313.01	289.368	276.309	282.825	279.929	287.968	1416.4	196.537	273.501	267.814	300.544	291.341	1329.74	289.258	294.873	297.01	292.829	279.317	1453.29
DEC_05	164.002	276.873	294.969	300.637	297.958	1334.44	298.888	312.006	301.104	306.516	317.491	1536	226.57	296.872	290.727	292.432	295.314	1401.92	302.388	302.921	303.104	303.977	306.372	1518.76	211.698	279.707	286.126	286.63	291.877	1356.04	300.543	306.261	306.359	305.157	305.447	1523.77
DEC_06	172.072	267.439	271.366	275.408	285.921	1272.21	284.8	279.173	294.941	280.012	282.856	1421.78	175.082	266.416	261.607	264.798	244.289	1212.19	291.693	299.129	292.354	301.278	321.749	1506.2	186.328	250.171	239.534	287.942	312.747	1276.72	324.071	330.623	313.047	314.897	286.177	1568.81
DEC_07	193.919	255.029	267.626	275.799	279.701	1272.08	280.969	284.548	286.801	287.534	281.881	1421.73	209.495	280.62	288.219	287.728	294.816	1360.88	296.998	295.651	298.075	298.998	301.844	1491.57	176.071	270.124	281.932	296.328	304.903	1329.36	310.087	309.708	310.665	313.945	309.334	1553.74
DEC_08	179.162	258.866	255.662	258.589	260.81	1213.09	263.87	270.708	274.019	277.44	276.375	1362.41	170.896	251.864	268.749	267.046	267.438	1225.99	266.086	271.566	271.291	271.048	278.487	1358.48	146.431	247.323	257.436	262.27	257.169	1170.63	256.965	260.491	265.424	262.28	264.012	1309.17
DEC_09	149.903	256.503	281.261	292.591	306.514	1286.77	310.916	283.349	281.147	283.216	285.821	1444.45	173.333	271.403	292.237	302.368	299.792	1339.13	293.734	286.253	288.536	294.418	281.653	1444.59	178.093	280.231	296.679	303.338	291.981	1350.32	293.961	287.953	296.093	274.734	273.663	1426.4
DEC_10	175.327	265.115	268.992	267.705	281.641	1258.78	282.102	269.076	281.17	273.967	256.408	1362.72	155.349	253.583	266.781	279.515	282.478	1237.71	278.526	281.139	282.437	286.644	287.945	1416.69	162.628	268.788	266.978	264.798	275.048	1238.24	277.191	279.952	279.399	274.046	285.507	1396.1
																														-18.9842	-38.642
																														24.4941	6.64741
																														48.8543	28.3389
																														16.7234	36.887
																														-45.8771	5.00348
																														64.5291	62.6111
																														-31.5199	62.172
																														-55.3634	-49.3057
																														11.1895	-18.189
																														0.533078	-20.5957

## Sheet: Pan
	BL_10	BL_20	BL_30	BL_40	BL_50	AUC FH	SUM	BL_60	BL_70	BL_80	BL_90	BL_100	AUC SH	SUM	102_10	102_20	102_30	102_40	102_50	AUC FH	SUM	102_60	102_70	102_80	102_90	102_100	AUC SH	SUM	105_10	105_20	105_30	105_40	105_50	AUC FH	SUM	105_60	105_70	105_80	105_90	105_100	AUC SH	SUM
DEC_01	245.934	84.7392	7.07106	-3.90759	-8.08854	2068.25	325.748	-1.77073	-1.79039	2.59868	-8.31059	27.851	55.3783	18.578	181.881	89.2344	54.5545	22.9671	2.01079	2587.02	350.648	-12.6827	-12.6132	-7.72547	54.8645	33.8562	451.125	55.6993	165.615	100.773	62.1504	31.162	13.4169	2836.01	373.117	11.022	12.6481	7.88409	26.3874	65.0002	849.307	122.942
DEC_02	137.9	94.9612	43.6555	14.7649	4.24009	2244.52	295.522	5.4703	-6.22911	-2.04437	26.4489	60.6489	512.35	84.2946	133.454	74.5211	54.0919	40.9377	30.8216	2516.88	333.826	17.3672	32.1145	28.7141	63.2397	49.5618	1575.33	190.997	140.588	80.5174	51.308	32.5249	19.8023	2445.45	324.741	14.2584	22.0284	27.7971	40.9332	65.3394	1305.58	170.357
DEC_03	245.413	175.441	99.7671	21.6274	0.903946	4199.94	543.152	-12.3454	23.1556	5.91491	49.9521	98.9433	1223.22	165.621	255.754	155.88	101.827	67.4969	34.9931	4705.77	615.951	45.4817	25.2328	2.95387	95.35	107.446	2000.01	276.465	235.379	167.048	121.669	70.606	53.4662	5037.45	648.168	14.8064	30.7324	4.36325	18.0433	65.8528	934.685	133.798
DEC_04	158.856	39.3211	32.5082	68.1148	67.9779	2533.61	366.778	53.4826	49.0307	36.2276	39.4734	33.4761	1682.11	211.691	174.301	61.7552	43.4236	64.2012	59.1017	2860.81	402.782	27.5725	77.7032	68.9705	56.2058	23.7478	2285.4	254.2	174.763	26.5189	26.1433	2.17032	87.4238	1859.26	317.02	61.1407	36.3726	0.00985748	3.27972	39.1908	898.279	139.994
DEC_05	278.59	109.686	-2.31607	-5.91573	-7.50036	2369.99	372.544	12.5872	11.9641	-12.9025	-35.9428	10.1189	-255.281	-14.1751	193.393	85.988	8.75979	10.6634	19.3834	2118	318.188	4.60279	-2.84327	48.666	29.0559	44.1769	992.684	123.658	110.094	57.8274	20.3509	11.0491	42.0933	1653.21	241.415	39.5553	14.378	5.91377	-0.134188	27.566	537.183	87.2789
DEC_06	206.42	89.8826	77.7671	60.9775	39.593	3516.34	474.641	53.1505	44.0015	17.6606	30.6935	75.9627	1569.12	221.469	233.232	106.514	79.7346	57.414	63.4744	3920.16	540.369	22.2898	26.2689	55.0848	72.0768	30.7721	1799.61	206.492	259.791	149.665	70.4253	20.7142	8.21515	3748.07	508.811	-12.5739	-25.1328	-5.20721	41.0861	67.1877	380.53	65.3599
DEC_07	177.516	66.0737	34.6543	39.5525	30.4872	2442.82	348.283	26.9295	15.8806	9.08325	9.28657	58.9116	771.709	120.091	182.995	79.8411	49.1033	42.0575	24.3601	2746.79	378.357	15.8968	14.997	14.1057	15.1034	55.6572	799.832	115.76	177.46	77.2451	53.2751	42.8783	31.2806	2777.69	382.139	27.6797	23.4642	19.9596	20.0777	41.59	981.363	132.771
DEC_08	162.348	110.807	48.5543	27.7109	30.2294	2833.61	379.65	42.5632	27.3514	36.3878	37.8455	52.9242	1493.28	197.072	184.864	74.9035	37.885	29.2898	25.4681	2472.45	352.411	30.6185	18.4632	32.1497	36.7951	98.5217	1519.78	216.548	200.611	55.74	49.7865	36.0667	33.312	2585.55	375.516	46.6659	43.5796	54.4886	38.4386	15.8207	1677.5	198.993
DEC_09	143.11	91.4564	64.7588	46.053	33.7966	2907.21	379.175	23.2356	50.298	62.708	97.1555	62.4498	2530.04	295.847	156.108	59.305	61.9	71.6974	53.6478	2977.8	402.658	49.5051	52.0986	41.1691	53.3458	92.5342	2176.33	288.653	171.652	104.092	92.8889	51.2448	49.8127	3589.58	469.69	38.8032	35.3293	13.9589	51.9828	89.3441	1653.45	229.418
DEC_10	198.014	67.361	59.9954	53.1522	37.5925	2983.12	416.115	28.3643	39.4598	31.4187	45.6112	124.31	1928.27	269.164	198.942	99.5714	59.7092	17.6026	17.3253	2850.17	393.151	23.3668	24.4941	27.5125	37.1729	115.731	1587.28	228.277	198.072	88.2215	78.2793	69.2134	46.3761	3579.38	480.162	43.1384	40.8182	41.2238	58.6982	89.9254	2072.72	273.804
